# Supplementary material for: How to measure multidimensional quality of life of persons with disabilities in public policies - a case of Poland
Source: Arch Public Health. 2022 Nov 10;80:230. doi: 10.1186/s13690-022-00981-5 (PMC9647975; doi:10.1186/s13690-022-00981-5)
Supplement: Supplementary file 2 — Additional file 2. Detailed results. [file 13690_2022_981_MOESM2_ESM.xlsx]

## Sheet: Arkusz1
Annex 2. Detailed results
Material living conditions
	Persons without disabilities					Persons with disabilities
Structural part	Variable	Coefficient	Std.Err.	z	P>|z|	Variable	Coefficient	Std.Err.	z	P>|z|
	Age	0.0985378	0.0088767	11.1	0	Age	0.176915	0.0126379	14	0
	Gender	-0.0602607	0.0051636	-11.67	0	Gender	-0.0121649	0.0065973	-1.84	0.065
	Having a partner	0.144966	0.0060903	23.8	0	Having a partner	0.122416	0.0072562	16.87	0
	Urbanisation degree	0.0286535	0.0051502	5.56	0	Urbanisation degree	0.0445355	0.0065975	6.75	0
	Vocational education	0.003501	0.0062768	0.56	0.577	Vocational education	0.0294049	0.0067153	4.38	0
	Secondary education	0.0900663	0.006087	14.8	0	Secondary education	0.0874703	0.0069509	12.58	0
	Tertiary education	0.178383	0.006272	28.44	0	Tertiary education	0.159252	0.0084076	18.94	0
	Employ	-0.0115042	0.0043826	-2.62	0.009	Employ	-0.0112076	0.0053078	-2.11	0.035
	Household size	-0.0029395	0.0062855	-0.47	0.64	Household size	0.0849593	0.0089148	9.53	0
	Healts self-assessment	-0.197139	0.0080551	-24.47	0	Healts self-assessment	-0.151778	0.0083512	-18.17	0
Mesurement part	Variable	Factor loading	Std.Err.	z	P>|z|	Variable	Factor loading	Std.Err.	z	P>|z|
	Equivalent income	1	(constrained)			Equivalent income	1	(constrained)
	Constant term	0.353255	0.0189741	18.62	0	Constant term	0.13064	0.0302303	4.32	0
	Impoverished	-0.706292	0.0161779	-43.66	0	Impoverished	-1.2795	0.0354183	-36.13	0
	Constant term	-0.223342	0.0144519	-15.45	0	Constant term	-0.290548	0.0394814	-7.36	0
	Income satisfaction	1.08951	0.0196211	55.53	0	Income satisfaction	1.53749	0.0371094	41.43	0
	Constant term	0.428504	0.0197501	21.7	0	Constant term	0.24532	0.0454229	5.4	0
	Material deprivation	-1.17496	0.0203319	-57.79	0	Material deprivation	-1.84262	0.0421668	-43.7	0
	Constant term	-0.423184	0.0208592	-20.29	0	Constant term	-0.313107	0.0534839	-5.85	0
	Making ends meet	1.25664	0.021454	58.57	0	Making ends meet	1.67861	0.0383687	43.75	0
	Constant term	0.437471	0.0222913	19.63	0	Constant term	0.316907	0.0487245	6.5	0
	Poor housing conditions	-0.40557	0.0149587	-27.11	0	Poor housing conditions	-0.70389	0.0339431	-20.74	0
	Constant term	-0.167261	0.0107489	-15.56	0	Constant term	-0.150162	0.026911	-5.58	0
	Overcrowded dwelling	-0.407396	0.0154619	-26.35	0	Overcrowded dwelling	-0.440831	0.0272575	-16.17	0
	Constant term	-0.213268	0.0109985	-19.39	0	Constant term	-0.36566	0.0195254	-18.73	0
Productive and main activity
	Persons without disabilities					Persons with disabilities
Structural part	Variable	Coefficient	Std.Err.	z	P>|z|	Variable	Coefficient	Std.Err.	z	P>|z|
	Age	-0.327057	0.0089785	-36.43	P>z	Age	-0.51489	0.0149079	-34.54	0
	Gender	-0.101955	0.0051195	-19.92	0	Gender	-0.0229987	0.0086896	-2.65	0.008
	Having a partner	0.252396	0.0061443	41.08	0	Having a partner	0.0850933	0.0090341	9.42	0
	Urbanisation degree	-0.0354887	0.0052974	-6.7	0	Urbanisation degree	-0.0082976	0.0086941	-0.95	0.34
	Vocational education	0.326022	0.0063827	51.08	0	Vocational education	0.0516094	0.0088669	5.82	0
	Secondary education	0.268925	0.0060015	44.81	0	Secondary education	0.0452143	0.0091844	4.92	0
	Tertiary education	0.376125	0.0059178	63.56	0	Tertiary education	0.148119	0.010741	13.79	0
	Household size	-0.0151643	0.0060422	-2.51	0	Household size	0.0294369	0.0103623	2.84	0.005
	Healts self-assessment	0.0707757	0.0080287	8.82	0.012	Healts self-assessment	0.13959	0.0102236	13.65	0
Measurement part	Variable	Factor loading	Std.Err.	z	P>|z|	Variable	Factor loading	Std.Err.	z	P>|z|
	Economic activity	1	(constrained)			Economic activity	1	(constrained)
	Constant term	0.154388	0.0063887	24.17	0	Constant term	0.294567	.0172993 17.03	0	0.260661
	Worked last week	1.03559	0.0029054	356.43	0	Worked last week	1.01385	.0042986 235.86	0	1.00543
	Constant term	0.144251	0.0064314	22.43	0	Constant term	0.302325	.017144 17.63	0	0.268723
	Long-term unemployed	-0.107717	0.0073275	-14.7	0	Long-term unemployed	-0.0359522	.0146435 -2.46	0.014	-0.064653
	Constant term	0.0487278	0.0069806	6.98	0	Constant term	-0.0138178	.0144391 -0.96	0.339	-0.0421178
	Low work intensity	-0.27743	0.0062547	-44.36	0	Low work intensity	-0.0157027	.0144276 -1.09	0.276	-0.0439802
	Constant term	0.210553	0.0065196	32.3	0	Constant term	-0.0236088	.014524 -1.63	0.104	-0.0520752
	Low income earners	0.470985	0.0063277	74.43	0	Low income earners	0.774911	.0079676 97.26	0	0.759295
	Constant term	0.116074	0.0069536	16.69	0	Constant term	0.288776	.0152179 18.98	0	0.258949
	Job satisfaction	0.0185973	0.0064975	2.86	0.004	Job satisfaction	-0.150605	.0121003 -12.45	0	-0.174321
	Constant term	0.0151866	0.006586	2.31	0.021	Constant term	-0.151322	.0125252 -12.08	0	-0.175871
Health
	Persons without disabilities					Persons with disabilities
	Variable	Coefficient	Std.Err.	z	P>|z|	Variable	Coefficient	Std.Err.	z	P>|z|
Structural part	Age	-0.486548	0.0067985	-71.57	0	Age	-0.317516	0.0159216	-19.94	0
	Gender	-0.0481315	0.0041218	-11.68	0	Gender	0.0373267	0.0097288	3.84	0
	Having a partner	-0.0373295	0.0049704	-7.51	0	Having a partner	0.0681796	0.0100779	6.77	0
	Urbanisation degree	0.0062925	0.0043202	1.46	0.145	Urbanisation degree	0.0108442	0.009729	1.11	0.265
	Vocational education	-0.0375376	0.0051435	-7.3	0	Vocational education	0.0230929	0.0099391	2.32	0.02
	Secondary education	-0.0004363	0.0047917	-0.09	0.927	Secondary education	0.0663144	0.0103338	6.42	0
	Tertiary education	0.0435751	0.0046292	9.41	0	Tertiary education	0.119177	0.0119396	9.98	0
	Household size	0.0353955	0.0049975	7.08	0	Household size	-0.0062965	0.0116317	-0.54	0.588
Measurement part	Variable	Factor loading	Std.Err.	z	P>|z|	Variable	Factor loading	Std.Err.	z	P>|z|
	Health self-assessment	1	(constrained)			Health self-assessment	1	(constrained)
	Constant term	0.480473	0.0049076	97.9	0	Constant term	-0.75075	0.0168569	-44.54	0
	Long-term illness	-0.555639	0.0087842	-63.25	0	Long-term illness	-0.125177	0.022879	-5.47	0
	Constant term	-0.273677	0.0040658	-67.31	0	Constant term	1.38315	0.0083282	166.08	0
	Unmet medical needs	-0.201129	0.007593	-26.49	0
	Constant term	-0.0429142	0.0049659	-8.64	0
Social relations and leisure
	Persons without disabilities					Persons with disabilities
	Variable	Coefficient	Std.Err.	z	P>|z|	Variable	Coefficient	Std.Err.	z	P>|z|
Structural part	Age	-0.0805401	0.0082893	-9.72	0	Age	-0.0259395	0.014111	-1.84	0.066
	Gender	0.0769125	0.0046061	16.7	0	Gender	0.0438064	0.0080266	5.46	0
	Having a partner	0.225868	0.0055414	40.76	0	Having a partner	0.179718	0.0089454	20.09	0
	Urbanisation degree	-0.0150036	0.0047086	-3.19	0.001	Urbanisation degree	0.030366	0.007818	3.88	0
	Vocational education	0.254781	0.0057356	44.42	0	Vocational education	0.0487873	0.0079277	6.15	0
	Secondary education	0.308868	0.0055201	55.95	0	Secondary education	0.0783147	0.0083123	9.42	0
	Tertiary education	0.302682	0.0054337	55.7	0	Tertiary education	0.117561	0.0099699	11.79	0
	Employ	0.0413872	0.0044138	9.38	0	Employ	0.009672	0.0062024	1.56	0.119
	Household size	-0.113384	0.0053694	-21.12	0	Household size	-0.0217647	0.0099776	-2.18	0.029
	Healts self-assessment	-0.195919	0.0083205	-23.55	0	Healts self-assessment	-0.227952	0.0107501	-21.2	0
Measurement part	Variable	Factor loading	Std.Err.	z	P>|z|	Variable	Factor loading	Std.Err.	z	P>|z|
	Social meetings	1	(constrained)			Social meetings	1	(constrained)
	Constant term	0.329645	0.0189437	17.4	0	Constant term	0.680394	0.0394375	17.25	0
	Leisure activities	0.777656	0.0086531	89.87	0	Leisure activities	0.743896	0.0271438	27.41	0
	Constant term	0.328939	0.0155326	21.18	0	Constant term	0.260859	0.0329412	7.92	0
	Non-material help	0.647672	0.0103784	62.41	0	Non-material help	0.429484	0.0312359	13.75	0
	Constant term	0.129842	0.0135402	9.59	0	Constant term	0.560874	0.0255331	21.97	0
	Loneliness	0.559357	0.0170537	32.8	0	Loneliness	1.19503	0.0501873	23.81	0
	Constant term	0.116072	0.012561	9.24	0	Constant term	0.502581	0.0471926	10.65	0
	Satisfaction with relations	0.635916	0.0170961	37.2	0	Satisfaction with relations	1.209	0.0473121	25.55	0
	Constant term	0.0693553	0.01385	5.01	0	Constant term	0.628901	0.0446525	14.08	0
	Satisfaction with leisure	0.215988	0.0172136	12.55	0	Satisfaction with leisure	0.591295	0.0357269	16.55	0
	Constant term	-0.0437292	0.0090699	-4.82	0	Constant term	0.505683	0.0301942	16.75	0
Economic security and physical safety
	Persons without disabilities					Persons with disabilities
	Variable	Coefficient	Std.Err.	z	P>|z|	Variable	Coefficient	Std.Err.	z	P>|z|
Structural part	Age	0.160055	0.0104517	15.31	0	Age	0.264049	0.0207474	12.73	0
	Gender	-0.0460794	0.0058218	-7.91	0	Gender	-0.0403058	0.0118264	-3.41	0.001
	Having a partner	0.068295	0.0070148	9.74	0	Having a partner	0.124973	0.0122495	10.2	0
	Urbanisation degree	-0.0018473	0.0063308	-0.29	0.77	Urbanisation degree	0.0388707	0.0122162	3.18	0.001
	Vocational education	-0.0288299	0.0071017	-4.06	0	Vocational education	0.0232394	0.0120306	1.93	0.053
	Secondary education	0.06523	0.0066691	9.78	0	Secondary education	0.122632	0.0124864	9.82	0
	Tertiary education	0.144117	0.0066364	21.72	0	Tertiary education	0.218913	0.0147028	14.89	0
	Employed	0.0293593	0.0057186	5.13	0	Employed	0.0245363	0.0094816	2.59	0.01
	Household size	0.0992762	0.0069147	14.36	0	Household size	0.21837	0.0144525	15.11	0
	Healts self-assessment	-0.203291	0.0102103	-19.91	0	Healts self-assessment	-0.167115	0.0143871	-11.62	0
Measurement part	Variable	Factor loading	Std.Err.	z	P>|z|	Variable	Factor loading	Std.Err.	z	P>|z|
	Unexpected expenses	1	(constrained)			Unexpected expenses	1	(constrained)
	Constant term	0.46024	0.0220373	20.88	0	Constant term	0.15947	0.0510008	3.13	0.002
	Persons in arrears	-0.398315	0.0239004	-16.67	0	Persons in arrears	-0.353851	0.036374	9.73	0
	Constant term	-0.167998	0.0137404	-12.23	0	Constant term	-0.0948401	0.0252186	3.76	0
	Lost job	-0.108906	0.0139519	-7.81	0	Lost job	-0.0337178	0.0141309	2.39	0.017
	Constant term	-0.0323818	0.0086807	-3.73	0	Constant term	-0.0429688	0.0116455	3.69	0
	Safety feeling	0.129577	0.0151081	8.58	0	Safety feeling	0.095722	0.0197904	4.84	0
	Constant term	0.057488	0.0088417	6.5	0	Constant term	0.0124184	0.0154058	0.81	0.42
